# Supplementary material
Source: ML conference proceedings conference paper supplement (https://proceedings.neurips.cc/paper_files/paper/2020/hash/2b346a0aa375a07f5a90a344a61416c4-Abstract.html)
Supplement: Supplementary file [file 2b346a0aa375a07f5a90a344a61416c4-Supplemental.zip]

---

# Supplementary Material for: Predictive Inference Is Free with the Jackknife+-after-Bootstrap

---

Anonymous Author(s)

Affiliation

Address

email

## 1 A Proof of Theorem 1

2 For completeness, we give the full details of the proof of Theorem 1; a sketch of the proof is presented  
3 in Section 4 of the main paper.

4 Denote Algorithm 3 by  $\tilde{\mathcal{A}}$ . We view  $\tilde{\mathcal{A}}$  as mapping a given input  $\{(X_i, Y_i)\}_{i=1}^{n+1}$  and a collection of  
5 subsamples or bootstrapped samples  $\tilde{S}_1, \dots, \tilde{S}_B$  to a matrix of residuals  $R \in \mathbb{R}^{(n+1) \times (n+1)}$ , where

$$R_{ij} = \begin{cases} |Y_i - \tilde{\mu}_{\varphi \setminus i, j}(X_i)| & \text{if } i \neq j, \\ 0 & \text{if } i = j. \end{cases}$$

6 For any permutation  $\sigma$  on  $\{1, \dots, n+1\}$ , let  $\Pi_\sigma$  stand for its matrix representation—that is,  $\Pi_\sigma \in$   
7  $\{0, 1\}^{(n+1) \times (n+1)}$  has entries  $(\Pi_\sigma)_{\sigma(i), i} = 1$  for each  $i$ , and zeros elsewhere. Furthermore, for each  
8 subsample or bootstrapped sample  $\tilde{S}_b = \{i_{b,1}, \dots, i_{b,m}\}$ , write  $\sigma(\tilde{S}_b) = \{\sigma(i_{b,1}), \dots, \sigma(i_{b,m})\}$ .

9 We now claim that

$$R \stackrel{d}{=} \Pi_\sigma R \Pi_\sigma^\top, \tag{S1}$$

10 for any fixed permutation  $\sigma$  on  $\{1, \dots, n+1\}$ . Here  $R$  is the residual matrix obtained by a run of  
11 Algorithm 3, namely,

$$R = \tilde{\mathcal{A}}\left((X_1, Y_1), \dots, (X_{n+1}, Y_{n+1}); \tilde{S}_1, \dots, \tilde{S}_B\right).$$

12 To see why (S1) holds, observe that deterministically, we have

$$\Pi_\sigma R \Pi_\sigma^\top = \tilde{\mathcal{A}}\left((X_{\sigma(1)}, Y_{\sigma(1)}), \dots, (X_{\sigma(n+1)}, Y_{\sigma(n+1)}); \sigma(\tilde{S}_1), \dots, \sigma(\tilde{S}_B)\right).$$

13 Furthermore, we have

$$\left((X_1, Y_1), \dots, (X_{n+1}, Y_{n+1})\right) \stackrel{d}{=} \left((X_{\sigma(1)}, Y_{\sigma(1)}), \dots, (X_{\sigma(n+1)}, Y_{\sigma(n+1)})\right)$$

14 by Assumption 1, and

$$\left(\tilde{S}_1, \dots, \tilde{S}_B\right) \stackrel{d}{=} \left(\sigma(\tilde{S}_1), \dots, \sigma(\tilde{S}_B)\right)$$

15 since subsampling or resampling treats all the indices the same. Finally, the subsamples or boot-  
16 strapped samples (i.e., the  $\tilde{S}_b$ 's) are drawn independently of the data points (i.e., the  $(X_i, Y_i)$ 's).  
17 Combining these calculations yields (S1).

18 Next, given  $R$ , define a “tournament matrix”  $A = A(R)$  as

$$A_{ij} = \begin{cases} \mathbb{I}[R_{ij} > R_{ji}] & \text{if } i \neq j, \\ 0 & \text{if } i = j. \end{cases}$$

19 It is easily checked that  $A(\Pi_\sigma R \Pi_\sigma^\top) = \Pi_\sigma A(R) \Pi_\sigma^\top$ , and hence (S1) implies that

$$A \stackrel{d}{=} \Pi_\sigma A \Pi_\sigma^\top. \quad (\text{S2})$$

20 Let  $S_\alpha(A)$  be the set of row indices with row sums greater than or equal to  $(1 - \alpha)(n + 1)$ , i.e.,

$$S_\alpha(A) = \left\{ i = 1, \dots, n + 1 : \sum_{j=1}^{n+1} A_{ij} \geq (1 - \alpha)(n + 1) \right\}.$$

21 The argument of Step 3 in the proof of Barber et al. [1, Theorem 1] applies to the lifted J+aB  
22 “tournament matrix”  $A$ , and it holds deterministically that

$$|S_\alpha(A)| \leq 2\alpha(n + 1). \quad (\text{S3})$$

23 On the other hand, if  $j$  is any index, and  $\sigma$  is any permutation that swaps indices  $n + 1$  and  $j$ , then

$$\mathbb{P}[n + 1 \in S_\alpha(A)] = \mathbb{P}[j \in S_\alpha(\Pi_\sigma A \Pi_\sigma^\top)] = \mathbb{P}[j \in S_\alpha(A)].$$

24 The first two events are the same, and the second equality uses (S2). Thus,

$$\begin{aligned} \mathbb{P}[n + 1 \in S_\alpha(A)] &= \frac{1}{n + 1} \sum_{j=1}^{n+1} \mathbb{P}[j \in S_\alpha(A)] \\ &= \frac{1}{n + 1} \mathbb{E} \left[ \sum_{j=1}^{n+1} \mathbb{I}[j \in S_\alpha(A)] \right] = \frac{\mathbb{E}|S_\alpha(A)|}{n + 1} \leq 2\alpha. \end{aligned} \quad (\text{S4})$$

25 Note that the event  $[n + 1 \in S_\alpha(A)]$  is exactly the event  $\tilde{\mathcal{E}}_{n+1}$ , defined in Section 4. As described in  
26 the proof sketch in Section 4 of the main paper, we can couple this lifted event to the event  $\mathcal{E}_{n+1}$ ,  
27 also defined in Section 4 in terms of the actual J+aB, as follows. Let  $B = \sum_{b=1}^{\tilde{B}} \mathbb{I}[\tilde{S}_b \not\geq n + 1]$ , the  
28 number of  $\tilde{S}_b$ ’s containing only training data, and let  $1 \leq b_1 < \dots < b_B \leq \tilde{B}$  be the corresponding  
29 indices. Note that the distribution of  $B$  is Binomial, as specified in the theorem. Now, for each  
30  $k = 1, \dots, B$ , define  $S_k = \tilde{S}_{b_k}$ . We can observe that each  $S_k$  is an independent uniform draw  
31 from  $\{1, \dots, n\}$  (with or without replacement). Therefore, we can equivalently consider running  
32 J+aB (Algorithm 2) with these particular subsamples or bootstrapped samples  $S_1, \dots, S_B$ , in which  
33 case it holds deterministically that  $\tilde{\mu}_{\varphi \setminus n+1, i} = \hat{\mu}_{\varphi \setminus i}$  for each  $i = 1, \dots, n$ . This ensures that  
34  $|Y_{n+1} - \tilde{\mu}_{\varphi \setminus n+1, i}(X_{n+1})| = |Y_{n+1} - \hat{\mu}_{\varphi \setminus i}(X_{n+1})|$  and  $|Y_i - \tilde{\mu}_{\varphi \setminus i, n+1}(X_i)| = |Y_i - \hat{\mu}_{\varphi \setminus i}(X_i)|$ ,  
35 and thus,

$$\mathbb{P}[\mathcal{E}_{n+1}] = \mathbb{P}[\tilde{\mathcal{E}}_{n+1}] \leq 2\alpha.$$

36 Finally, as in Step 1 in the proof of Barber et al. [1, Theorem 1], it easily follows from the definition  
37 of  $\hat{C}_{\alpha, n, B}^{\text{J+aB}}$  that if  $Y_{n+1} \notin \hat{C}_{\alpha, n, B}^{\text{J+aB}}(X_{n+1})$  then the event  $\mathcal{E}_{n+1}$  must occur. Indeed, if  $Y_{n+1} \notin$   
38  $\hat{C}_{\alpha, n, B}^{\text{J+aB}}(X_{n+1})$ , then either  $Y_{n+1}$  falls below the lower bound, i.e.,

$$\sum_{i=1}^n \mathbb{I}[Y_{n+1} - \hat{\mu}_{\varphi \setminus i}(X_{n+1}) < |Y_i - \hat{\mu}_{\varphi \setminus i}(X_i)|] \geq (1 - \alpha)(n + 1),$$

39 or  $Y_{n+1}$  exceeds the upper bound, i.e.,

$$\sum_{i=1}^n \mathbb{I}[Y_{n+1} - \hat{\mu}_{\varphi \setminus i}(X_{n+1}) > |Y_i - \hat{\mu}_{\varphi \setminus i}(X_i)|] \geq (1 - \alpha)(n + 1),$$

40 and the above two expressions imply

$$\sum_{i=1}^n \mathbb{I}[|Y_{n+1} - \hat{\mu}_{\varphi \setminus i}(X_{n+1})| > |Y_i - \hat{\mu}_{\varphi \setminus i}(X_i)|] \geq (1 - \alpha)(n + 1).$$

41 Therefore, we conclude that

$$\mathbb{P}[Y_{n+1} \notin \hat{C}_{\alpha, n, B}^{\text{J+aB}}(X_{n+1})] \leq 2\alpha,$$

42 thus proving the theorem.

## 43 B Guarantees with stability

44 Many ensembles that are used in practice are variants of bagging, where multiple independent copies  
 45 of the given training data set are generated through a resampling mechanism, after which estimates  
 46 from different data sets are pooled together via an averaging procedure of some kind. Bagging can be  
 47 understood as a smoothing operation that when applied on a discontinuous base learner, often greatly  
 48 improve its accuracy [3–5].

49 For ensembles of this type, the aggregated predictions they produce frequently exhibit a concentrating  
 50 behavior as  $B \rightarrow \infty$ , making the corresponding J+aB interval much like a jackknife+ interval. In  
 51 such cases, it is reasonable to expect a J+aB interval to remain valid regardless of the choice of  $B$ , e.g.,  
 52 random with a Binomial distribution or fixed, by its proximity to a jackknife+ interval. Intuitively,  
 53 this happens when the aggregation is insensitive to any one prediction participating in the ensemble.

54 To formalize, let  $\mathbb{E}^*$  denote the expectation with respect to the resampling measure — that is, we  
 55 take the expectation with respect to the random collection of subsamples or bootstrapped samples  
 56  $S_1, \dots, S_B$  conditional on all the observed data  $\{(X_i, Y_i)\}_{i=1}^n$  and  $X_{n+1}$ . For example, when  
 57  $\varphi(\cdot) = \text{mean}(\cdot)$  is the mean aggregation,

$$\mathbb{E}^*[\hat{\mu}_{\text{mean}}(X_{n+1})] = \mathbb{E}[\hat{\mu}_1(X_{n+1}) | (X_1, Y_1), \dots, (X_n, Y_n), X_{n+1}],$$

58 the expected prediction from the model  $\hat{\mu}_1$  fitted on training sample  $S_1$ , where the expectation is  
 59 taken with respect to the draw of  $S_1$ .

60 **Assumption S1** (Ensemble stability). For  $\varepsilon \geq 0$  and  $\delta \in (0, 1)$ , it holds for each  $i = 1, \dots, n$  that

$$\mathbb{P} \left[ |\hat{\mu}_{\varphi \setminus i}(X_i) - \mathbb{E}^*[\hat{\mu}_{\varphi \setminus i}(X_i)]| > \varepsilon \right] \leq \delta.$$

61 Here  $\hat{\mu}_{\varphi \setminus i}$  is the ensembled leave-one-out model defined in Algorithm 2. To gain intuition for this  
 62 assumption, we consider the mean aggregation as a canonical example, and verify that it satisfies  
 63 Assumption S1 for any bounded base regression method.

64 **Proposition S1.** Suppose that  $\varphi(\cdot) = \text{mean}(\cdot)$  is the mean aggregation, and suppose the base  
 65 regression method  $\mathcal{R}$  always outputs a bounded regression function, i.e.,  $\mathcal{R}$  maps any training data  
 66 set to a function  $\hat{\mu}$  taking values in a bounded range  $[\ell, u]$ , for fixed constants  $\ell < u$ . Then, for any  
 67  $\varepsilon > 0$ , Assumption S1 is satisfied with

$$\delta = 2 \exp \left( -\frac{2\sqrt{B}\theta\varepsilon^2}{(u-\ell)^2} \right) + \exp \left( -\frac{(\sqrt{B}-1)^2\theta^2}{2} \right),$$

68 where  $\theta = (1 - \frac{1}{n})^m$  in the case of bagging (i.e., the  $S_b$ 's are bootstrapped samples, drawn with  
 69 replacement), or  $\theta = 1 - \frac{m}{n}$  in the case of subbagging (i.e., the  $S_b$ 's are subsamples drawn without  
 70 replacement).

71 *Proof.* By exchangeability, it suffices to prove the statement for a single  $i \in \{1, \dots, n\}$ . Fix  $i$ , and  
 72 let  $B_i$  denote the number of  $S_b$ 's not containing the index  $i$ , i.e.,  $B_i = \sum_{b=1}^B \mathbb{1}[S_b \not\ni i]$ . For any  
 73 fixed  $\gamma \in (0, 1)$ ,

$$\begin{aligned} \mathbb{P}^* \left[ |\hat{\mu}_{\text{mean} \setminus i}(X_i) - \mathbb{E}^*[\hat{\mu}_{\text{mean} \setminus i}(X_i)]| > \varepsilon \right] \\ \leq \mathbb{P}^* \left[ |\hat{\mu}_{\text{mean} \setminus i}(X_i) - \mathbb{E}^*[\hat{\mu}_{\text{mean} \setminus i}(X_i)]| > \varepsilon \text{ and } B_i \geq \gamma\theta B \right] + \mathbb{P}^* \left[ B_i < \gamma\theta B \right]. \end{aligned}$$

74 As for our earlier notation  $\mathbb{E}^*$ , here  $\mathbb{P}^*$  denotes the probability with respect to the random collection  
 75 of subsamples or bootstrapped samples  $S_1, \dots, S_B$  conditional on the data  $(X_1, Y_1), \dots, (X_n, Y_n)$ .

76 The arithmetic mean aggregation function,  $\varphi_{\text{mean}}$ , satisfies

$$\sup_{\substack{y_1, \dots, y_{B_i}, \\ y'_b \in [\ell, u]}} |\varphi_{\text{mean}}(y_1, \dots, y_{B_i}) - \varphi_{\text{mean}}(y_1, \dots, y_{b-1}, y'_b, y_{b+1}, \dots, y_{B_i})| \leq \frac{u-\ell}{B_i}, \quad b = 1, \dots, B_i.$$

77 Thus, by McDiarmid's inequality [2, Theorem 6.2],

$$\mathbb{P}^* \left[ |\hat{\mu}_{\text{mean} \setminus i}(X_i) - \mathbb{E}^*[\hat{\mu}_{\text{mean} \setminus i}(X_i)]| > \varepsilon \mid B_i \geq \gamma\theta B \right] \leq 2 \exp \left( -\frac{2B\gamma\theta\varepsilon^2}{(u-\ell)^2} \right). \quad (\text{S5})$$

On the other hand,  $B_i \sim \text{Binomial}(B, \theta)$ , where  $\theta = (1 - \frac{1}{n})^m$  for sampling with replacement, or  $\theta = 1 - \frac{m}{n}$  for sampling without replacement. The Chernoff inequality for the binomial [2, Chapter 2] implies

$$\mathbb{P}[B_i < \gamma \theta B] \leq \exp\left(-\frac{B(1-\gamma)^2 \theta^2}{2}\right). \quad (\text{S6})$$

Combining (S5) and (S6),

$$\mathbb{P}^* \left[ |\hat{\mu}_{\text{mean} \setminus i}(X_i) - \mathbb{E}^*[\hat{\mu}_{\text{mean} \setminus i}(X_i)]| > \varepsilon \right] \leq 2 \exp\left(-\frac{2B\gamma\theta\varepsilon^2}{(u-\ell)^2}\right) + \exp\left(-\frac{B(1-\gamma)^2 \theta^2}{2}\right).$$

Taking  $\gamma = 1/\sqrt{B}$  yields

$$\mathbb{P}^* \left[ |\hat{\mu}_{\text{mean} \setminus i}(X_i) - \mathbb{E}^*[\hat{\mu}_{\text{mean} \setminus i}(X_i)]| > \varepsilon \right] \leq 2 \exp\left(-\frac{2\sqrt{B}\theta\varepsilon^2}{(u-\ell)^2}\right) + \exp\left(-\frac{(\sqrt{B}-1)^2 \theta^2}{2}\right).$$

□

To study coverage properties under this notion of stability, we first define the  $\varepsilon$ -inflated J+aB prediction interval as

$$\hat{C}_{\alpha,n,B}^{\varepsilon\text{-J+aB}}(x) = [q_{\alpha,n}^- \{\hat{\mu}_{\varphi \setminus i}(x) - R_i\} - \varepsilon, q_{\alpha,n}^+ \{\hat{\mu}_{\varphi \setminus i}(x) + R_i\} + \varepsilon],$$

for any  $\varepsilon \geq 0$ . We then have the following guarantee:

**Theorem S1.** *Under  $(\varepsilon, \delta)$ -ensemble stability (Assumption S1), the  $2\varepsilon$ -inflated jackknife+-after-bootstrap prediction interval satisfies*

$$\mathbb{P} \left[ Y_{n+1} \in \hat{C}_{\alpha,n,B}^{2\varepsilon\text{-J+aB}}(X_{n+1}) \right] \geq 1 - 2\alpha - 4\sqrt{\delta}.$$

Delaying the proof to the end of this section, we discuss the difference between Theorem S1 and Theorem 1. Theorem 1 gives an *assumption-free* lower-bound of  $1 - 2\alpha$  on the coverage, but the probability is over all randomness, including that of the Binomial draw. By contrast, the  $\approx 1 - 2\alpha$  coverage guarantee of Theorem S1 holds for a *fixed* value of  $B$  used to run Algorithm 2, but at the cost of requiring the ensemble algorithm  $\mathcal{R}_{\varphi,B}$  to satisfy ensemble stability.

In contrast to the above notion of ensemble stability, Steinberger and Leeb [6] and Barber et al. [1] study coverage of jackknife and jackknife+ under *algorithmic stability* of (non-ensembled) regression method  $\mathcal{R}$ . This requires  $\mathcal{R}$  to satisfy

$$\mathbb{P} \left[ |\hat{\mu}_{\setminus i}(X_{n+1}) - \hat{\mu}(X_{n+1})| > \varepsilon^* \right] \leq \delta^*. \quad (\text{S7})$$

This can be interpreted as saying that a prediction  $\hat{\mu}(X_{n+1})$  is only slightly perturbed if a single point is removed from the training. In this setting, jackknife and jackknife+ are each shown to guarantee  $\approx 1 - \alpha$  coverage.

We can take a lifted version of this assumption, requiring that (S7) holds on the ensembled models on average over the resampling process:

$$\mathbb{P} \left[ |\mathbb{E}^*[\hat{\mu}_{\varphi \setminus i}(X_{n+1})] - \mathbb{E}^*[\hat{\mu}_{\varphi}(X_{n+1})]| > \varepsilon^* \right] \leq \delta^*. \quad (\text{S8})$$

Note that one can have ensemble stability without algorithmic stability. For example, a bounded regression method may still be highly unstable relative to adding/removing a single data point (thus violating algorithmic stability), while Proposition S1 ensures that ensemble stability will hold under mean aggregation.

When an ensemble method satisfies both Assumption S1 and the lifted version of algorithmic stability (S8), then the following result yields a coverage bound that is  $\approx 1 - \alpha$ , rather than  $\approx 1 - 2\alpha$  as in Theorem S1:

**Theorem S2.** *Assume that  $(\varepsilon, \delta)$ -ensemble stability (Assumption S1) holds, and in addition, the ensembled model satisfies algorithmic stability on average over the resampling process, i.e., (S8). Then the  $2\varepsilon + 2\varepsilon^*$ -inflated J+aB prediction interval satisfies*

$$\mathbb{P} \left[ Y_{n+1} \in \hat{C}_{\alpha,n,B}^{(2\varepsilon+2\varepsilon^*)\text{-J+aB}}(X_{n+1}) \right] \geq 1 - \alpha - 3\sqrt{\delta} - 4\sqrt{\delta^*}.$$

112 *Proof of Theorems S1 and S2.* Put  $\hat{\mu}_{\varphi \setminus i}^* = \mathbb{E}^*[\hat{\mu}_{\varphi \setminus i}]$ , where we recall that  $\mathbb{E}^*$  is the expectation  
 113 conditional on the data. Let  $\mathcal{R}_{\varphi}^*$  denote the regression algorithm mapping data to  $\hat{\mu}_{\varphi}^*$ , i.e.,

$$\mathcal{R}_{\varphi}^* : \{(X_i, Y_i)\}_{i=1}^n \mapsto \mathbb{E}^* \left[ \varphi \left( \left\{ \mathcal{R} \left( \{(X_{i_b, \ell}, Y_{i_b, \ell})\}_{\ell=1}^m \right) : b = 1, \dots, B', B' \sim \text{Binomial}(B, \theta) \right\} \right) \right],$$

114 where  $\theta = \theta(n) = (1 - \frac{1}{n+1})^m$  (in the case of sampling with replacement) or  $\theta = \theta(n) = 1 - \frac{m}{n+1}$   
 115 (in the case of sampling without replacement). We emphasize that  $n$  here refers to the size of the  
 116 sample being fed through  $\mathcal{R}_{\varphi}^*$  (e.g., each leave-one-out regressor  $\hat{\mu}_{\varphi \setminus i}^*$  is trained on  $n - 1$  data points,  
 117 so in this case,  $\theta = \theta(n - 1)$ ).  $\mathcal{R}_{\varphi}^*$  is a deterministic function of the data, since it averages over the  
 118 random draw of the subsamples or bootstrapped samples. Furthermore, it is a symmetric regression  
 119 algorithm (i.e., satisfies Assumption 2).

120 Fix some  $\alpha' \in (0, 1)$  to be determined later, and construct the jackknife+ interval

$$\hat{C}_{\alpha', n}^{*J+}(x) = \left[ q_{\alpha', n}^- \{ \hat{\mu}_{\varphi \setminus i}^*(x) - R_i^* \}, q_{\alpha', n}^+ \{ \hat{\mu}_{\varphi \setminus i}^*(x) + R_i^* \} \right],$$

121 where  $R_i^* = |Y_i - \hat{\mu}_{\varphi \setminus i}^*(X_i)|$  is the leave-one-out residual for this new regression algorithm. By  
 122 Barber et al. [1, Theorem 1],  $\hat{C}_{\alpha', n}^{*J+}$  satisfies

$$\mathbb{P} \left[ Y_{n+1} \in \hat{C}_{\alpha', n}^{*J+}(X_{n+1}) \right] \geq 1 - 2\alpha'.$$

123 If, additionally,  $\mathcal{R}_{\varphi}^*$  satisfies the algorithmic stability condition (S7) given in Section B of the main  
 124 paper, then by Barber et al. [1, Theorem 5], the  $2\varepsilon^*$ -inflated jackknife+ interval

$$\hat{C}_{\alpha', n}^{*2\varepsilon^*-J+}(x) = \left[ q_{\alpha', n}^- \{ \hat{\mu}_{\varphi \setminus i}^*(x) - R_i^* \} - 2\varepsilon^*, q_{\alpha', n}^+ \{ \hat{\mu}_{\varphi \setminus i}^*(x) + R_i^* \} + 2\varepsilon^* \right]$$

125 satisfies

$$\mathbb{P} \left[ Y_{n+1} \in \hat{C}_{\alpha', n}^{*2\varepsilon^*-J+}(X_{n+1}) \right] \geq 1 - \alpha' - 4\sqrt{\delta^*}.$$

126 Next, by Assumption S1, for each  $i = 1, \dots, n$ ,

$$\mathbb{P} \left[ \left| \hat{\mu}_{\varphi \setminus i}(X_i) - \hat{\mu}_{\varphi \setminus i}^*(X_i) \right| > \varepsilon \right] \leq \delta. \quad (\text{S9})$$

127 Let  $\alpha' = \alpha - \sqrt{\delta}$ . By the above argument, to prove the theorems, it suffices to show

$$\hat{C}_{\alpha, n, B}^{2\varepsilon-J+aB}(X_{n+1}) \supseteq \hat{C}_{\alpha', n}^{*J+}(X_{n+1}) \quad \text{with probability at least } 1 - 2\sqrt{\delta}$$

128 in order to complete the proof of Theorem S1, or

$$\hat{C}_{\alpha, n, B}^{(2\varepsilon+2\varepsilon^*)-J+aB}(X_{n+1}) \supseteq \hat{C}_{\alpha', n}^{*2\varepsilon^*-J+}(X_{n+1}) \quad \text{with probability at least } 1 - 2\sqrt{\delta}$$

129 in order to complete the proof of Theorem S2. In fact, these two claims are proved identically—we  
 130 simply need to show that

$$\hat{C}_{\alpha, n, B}^{(2\varepsilon+2\varepsilon')-J+aB}(X_{n+1}) \supseteq \hat{C}_{\alpha', n}^{*2\varepsilon'-J+}(X_{n+1}) \quad \text{with probability at least } 1 - 2\sqrt{\delta} \quad (\text{S10})$$

131 with the choice  $\varepsilon' = 0$  for Theorem S1, or  $\varepsilon' = \varepsilon^*$  for Theorem S2.

132 To complete the proof, then, we establish the bound (S10). Suppose  $\hat{C}_{\alpha, n, B}^{(2\varepsilon+2\varepsilon')-J+aB}(X_{n+1}) \not\supseteq$   
 133  $\hat{C}_{\alpha', n}^{*2\varepsilon'-J+}(X_{n+1})$ . We have that either

$$q_{\alpha, n}^+ \{ \hat{\mu}_{\varphi \setminus i}(X_{n+1}) + R_i \} + 2\varepsilon < q_{\alpha', n}^+ \{ \hat{\mu}_{\varphi \setminus i}^*(X_{n+1}) + R_i^* \}$$

134 or

$$q_{\alpha, n}^- \{ \hat{\mu}_{\varphi \setminus i}(X_{n+1}) - R_i \} - 2\varepsilon > q_{\alpha', n}^- \{ \hat{\mu}_{\varphi \setminus i}^*(X_{n+1}) - R_i^* \},$$

135 where  $R_i = |Y_i - \hat{\mu}_{\varphi \setminus i}(X_i)|$ . As in the proof of Barber et al. [1, Theorem 5], this implies that

$$\left| \hat{\mu}_{\varphi \setminus i}(X_{n+1}) - \hat{\mu}_{\varphi \setminus i}^*(X_{n+1}) \right| + \left| \hat{\mu}_{\varphi \setminus i}(X_i) - \hat{\mu}_{\varphi \setminus i}^*(X_i) \right| > 2\varepsilon$$

for at least  $\lceil (1 - \alpha)(n + 1) \rceil - (\lceil (1 - \alpha')(n + 1) \rceil - 1) \geq \sqrt{\delta}(n + 1)$  many indices  $i = 1, \dots, n$ .  
Thus,

$$\begin{aligned} & \mathbb{P} \left[ \hat{C}_{\alpha, n, B}^{(2\varepsilon + 2\varepsilon')\text{-J+AB}}(X_{n+1}) \not\supseteq \hat{C}_{\alpha', n}^{*2\varepsilon'\text{-J+}}(X_{n+1}) \right] \\ & \leq \mathbb{P} \left[ \sum_{i=1}^n \mathbb{I} \left[ \left| \hat{\mu}_{\varphi \setminus i}(X_{n+1}) - \hat{\mu}_{\varphi \setminus i}^*(X_{n+1}) \right| + \left| \hat{\mu}_{\varphi \setminus i}(X_i) - \hat{\mu}_{\varphi \setminus i}^*(X_i) \right| > 2\varepsilon \right] \geq \sqrt{\delta}(n + 1) \right] \\ & \leq \frac{1}{\sqrt{\delta}(n + 1)} \sum_{i=1}^n \mathbb{P} \left[ \left| \hat{\mu}_{\varphi \setminus i}(X_{n+1}) - \hat{\mu}_{\varphi \setminus i}^*(X_{n+1}) \right| + \left| \hat{\mu}_{\varphi \setminus i}(X_i) - \hat{\mu}_{\varphi \setminus i}^*(X_i) \right| > 2\varepsilon \right] \\ & \leq \frac{2n}{\sqrt{\delta}(n + 1)} \mathbb{P} \left[ \left| \hat{\mu}_{\varphi \setminus n}(X_{n+1}) - \hat{\mu}_{\varphi \setminus n}^*(X_{n+1}) \right| > \varepsilon \right]. \end{aligned}$$

The second inequality is the Markov's inequality, and the last step uses the exchangeability of the data points. Plugging in (S9),

$$\mathbb{P} \left[ \hat{C}_{\alpha, n, B}^{(2\varepsilon + 2\varepsilon')\text{-J+AB}}(X_{n+1}) \not\supseteq \hat{C}_{\alpha', n}^{*2\varepsilon'\text{-J+}}(X_{n+1}) \right] \leq 2\sqrt{\delta},$$

implying (S10). This completes the proofs for Theorems S1 and S2.  $\square$

## C Jackknife-minmax-after-bootstrap

As in Barber et al. [1], we may also consider the *jackknife-minmax-after-bootstrap*, which constructs the interval

$$\hat{C}_{\alpha, n, B}^{\text{J-mm-aB}}(x) = \left[ \min_i \hat{\mu}_{\varphi \setminus i}(x) - q_{\alpha, n}^- \{R_i\}, \max_i \hat{\mu}_{\varphi \setminus i}(x) + q_{\alpha, n}^+ \{R_i\} \right].$$

The original jackknife-minmax satisfies  $1 - \alpha$  lower bound on the coverage, and the same modification of the jackknife+ proof is applicable here, ensuring a  $1 - \alpha$  lower bound on the coverage of the jackknife-minmax-after-bootstrap with the same caveat of a random  $B$ . However, as for the non-ensembled version, the method is too conservative, and is not recommended for practice.

## D Supplementary experiments

In this section, we report the results on additional experiments.

First, we provide a more detailed description of the ensembles and the jackknife-type constructions considered. Let  $\mathcal{R}_{\varphi, B}$  denote the ensemble Algorithm 1 that first generates  $B$  bootstrap replicates of the given training data set, calls on a base regression method  $\mathcal{R}$  to fit a model to each generated data set, after which the results are combined through an aggregation function  $\varphi$ . For  $\mathcal{R}$ , we use one of RIDGE, RF, or NN, which are described in Section 5. For  $\varphi$ , we use one of MEAN, MEDIAN, or TRIMMED MEAN:

- MEAN is the arithmetic mean, i.e.,  $\varphi(y_1, \dots, y_k) = k^{-1} \sum_{i=1}^k y_k$ .
- MEDIAN is the middle value of the given list, i.e., for odd  $k$ ,  $\varphi(y_1, \dots, y_k)$  is the  $(k + 1)/2$ -th smallest number of the list  $\{y_1, \dots, y_k\}$ ; for even  $k$ , it is the average of the  $k/2$ -th and the  $(k + 2)/2$ -th smallest.
- TRIMMED MEAN is the arithmetic mean of the middle 50% of the given list, i.e.,  $\varphi(y_1, \dots, y_k) = (\lceil 0.75k \rceil - \lfloor 0.25k \rfloor)^{-1} \sum_{i=\lfloor 0.25k \rfloor + 1}^{\lceil 0.75k \rceil} y_{(i)}$ , where  $y_{(1)} \leq \dots \leq y_{(k)}$  is the sorted list. We use `scipy.stats.trim_mean` with `proportioncut=0.25`.

J+AB is defined in Algorithm 2. J+ ENSEMBLE refers to the following application of the jackknife+ [1] with the ensemble learner  $\mathcal{R}_{\varphi, B'}$  (with hyperparameter  $B'$ ):

---

**Algorithm 1** J+ ENSEMBLE

---

**for**  $i = 1, \dots, n$  **do**  
    Compute  $\hat{\mu}_{\setminus i}^{J+ \text{ ENSEMBLE}} = \mathcal{R}_{\varphi, B'}(\{(X_j, Y_j)\}_{j=1, j \neq i}^n)$   
    Compute the residual,  $R_i^{J+ \text{ ENSEMBLE}} = |Y_i - \hat{\mu}_{\setminus i}^{J+ \text{ ENSEMBLE}}(X_i)|$ .  
**end for**  
Compute the ensembled prediction interval: at each  $x \in \mathbb{R}$ ,  

$$\hat{C}_{\alpha, n, B'}^{J+ \text{ ENSEMBLE}}(x) = \left[ q_{\alpha, n}^- \{ \hat{\mu}_{\setminus i}^{J+ \text{ ENSEMBLE}}(x) - R_i^{J+ \text{ ENSEMBLE}} \}, q_{\alpha, n}^+ \{ \hat{\mu}_{\setminus i}^{J+ \text{ ENSEMBLE}}(x) + R_i^{J+ \text{ ENSEMBLE}} \} \right].$$

---

165 By contrast, J+ NON-ENSEMBLE applies the jackknife+ around the *base* learning algorithm  $\mathcal{R}$ :

---

**Algorithm 2** J+ NON-ENSEMBLE

---

**for**  $i = 1, \dots, n$  **do**  
    Compute  $\hat{\mu}_{\setminus i}^{J+ \text{ NON-ENSEMBLE}} = \mathcal{R}(\{(X_j, Y_j)\}_{j=1, j \neq i}^n)$   
    Compute the residual,  $R_i^{J+ \text{ NON-ENSEMBLE}} = |Y_i - \hat{\mu}_{\setminus i}^{J+ \text{ NON-ENSEMBLE}}(X_i)|$ .  
**end for**  
Compute the *non-ensembled* prediction interval: at each  $x \in \mathbb{R}$ ,  

$$\hat{C}_{\alpha, n}^{J+ \text{ NON-ENSEMBLE}}(x) = \left[ q_{\alpha, n}^- \{ \hat{\mu}_{\setminus i}^{J+ \text{ NON-ENSEMBLE}}(x) - R_i^{J+ \text{ NON-ENSEMBLE}} \}, q_{\alpha, n}^+ \{ \hat{\mu}_{\setminus i}^{J+ \text{ NON-ENSEMBLE}}(x) + R_i^{J+ \text{ NON-ENSEMBLE}} \} \right].$$

---

166 Note that for J+AB, we match the *expected* number of models aggregated in each leave-one-out  
167 model  $\hat{\mu}_{\varphi \setminus i}$  to  $B'$ , the fixed number of models aggregated in each ensembled model  $\hat{\mu}_{\setminus i}^{J+ \text{ ENSEMBLE}}$  by  
168 drawing  $B \sim \text{Binomial}(\tilde{B}, (1 - \frac{1}{n+1})^m)$  with  $\tilde{B} = \lceil B' / \{(1 - \frac{1}{n+1})^m (1 - \frac{1}{n})^m\} \rceil$ , where  $\lceil \cdot \rceil$  refers  
169 to the integer part of the argument.

170 In Section 5, we compared J+AB with J+ ENSEMBLE and J+ NON-ENSEMBLE for  $\mathcal{R} = \text{RF}$  and  
171  $\varphi = \text{MEAN}$  using MEPS data set. Here, we use all nine combinations of  $\mathcal{R}$  and  $\varphi$ , and also expand  
172 the number of trials to ten. The results are presented in Figures S1 and S2. In Table S1, we report the  
173 average wall-clock time for each  $\mathcal{R}$ - $\varphi$  combination for  $m = 0.6n$ . The additional results lend extra  
174 support to the conclusion that the J+AB is a computationally efficient alternative to J+ ENSEMBLE,  
175 which yields more precise confidence intervals than J+ NON-ENSEMBLE when ensembling improves  
176 the precision of the base regression method.

Table S1: Average wall-clock times in seconds over 10 independent splits of MEPS data set.  
( $m = 0.6n$  and sampling with replacement)

| ENSEMBLE      |              | J+AB  | J+ ENSEMBLE | J+ NON-ENSEMBLE |
|---------------|--------------|-------|-------------|-----------------|
| $\mathcal{R}$ | $\varphi$    |       |             |                 |
| RIDGE         | MEAN         | 0.22  | 1.93        | 0.40            |
|               | MEDIAN       | 0.59  | 2.71        |                 |
|               | TRIMMED MEAN | 0.57  | 2.58        |                 |
| RF            | MEAN         | 6.03  | 43.87       | 4.60            |
|               | MEDIAN       | 6.24  | 44.29       |                 |
|               | TRIMMED MEAN | 6.84  | 39.23       |                 |
| NN            | MEAN         | 16.82 | 160.00      | 14.12           |
|               | MEDIAN       | 17.80 | 169.31      |                 |
|               | TRIMMED MEAN | 17.48 | 162.84      |                 |

177 The other experiment in Section 5 checked the coverage of the J+aB method using a Binomial  $B$ .  
178 Only the results for  $m = 0.6n$  on the MEPS data set were reported. Here, we present the complete  
179 set of results for  $m/n = 0.1, 0.2, \dots, 1.0$  and for all three data sets. We expand the number of trials  
180 to ten, and increase  $n = 200$  and the hyperparameter  $\tilde{B}$  in  $B \sim \text{Binomial}(\tilde{B}, (1 - \frac{1}{n+1})^m)$ . In  
181 addition, we report the results with  $B'$  FIXED (as opposed to RANDOM). For J+AB FIXED, we fix  
182 the total number of bootstrap replicates at  $B' = 50$ . For J+AB RANDOM, we set the *expected* total  
183 number of bootstrap replicates to  $B'$  by taking  $\tilde{B} = \lceil B' / (1 - \frac{1}{n+1})^m \rceil$ . Consistent with what we saw  
184 in Table 1, the coverage respects the  $1 - 2\alpha$  lower bound, and in fact, stays close to  $1 - \alpha$  in all  
185 considered scenarios. In addition, Figures S3–S8 show that J+AB RANDOM and J+AB FIXED have  
186 essentially the same behavior in practice.

## 187 References

- 188 [1] Rina Foygel Barber, Emmanuel J. Candès, Aaditya Ramdas, and Ryan J. Tibshirani. Predictive  
189 inference with the jackknife+, 2019. arXiv preprint.
- 190 [2] Stéphane Boucheron, Gábor Lugosi, and Pascal Massart. *Concentration Inequalities: A*  
191 *Nonasymptotic Theory of Independence*. Oxford University Press, 2013. ISBN 9780199535255.  
192 doi: 10.1093/acprof:oso/9780199535255.001.0001. URL <https://www.oxfordscholarship.com/10.1093/acprof:oso/9780199535255.001.0001/acprof-9780199535255>.
- 194 [3] Peter Bühlmann and Bin Yu. Analyzing bagging. *Ann. Statist.*, 30(4):927–961, Aug 2002. doi:  
195 10.1214/aos/1031689014. URL <https://doi.org/10.1214/aos/1031689014>.
- 196 [4] Andreas Buja and Werner Stuetzle. Observations on bagging. *Statist. Sinica*, 16(2):323–351,  
197 2006. ISSN 1017-0405.
- 198 [5] Jerome H. Friedman and Peter Hall. On bagging and nonlinear estimation. *Journal of Statistical*  
199 *Planning and Inference*, 137(3):669–683, 2007. ISSN 0378-3758. doi: [https://doi.org/10.](https://doi.org/10.1016/j.jspi.2006.06.002)  
200 [1016/j.jspi.2006.06.002](https://doi.org/10.1016/j.jspi.2006.06.002). URL [http://www.sciencedirect.com/science/article/pii/](http://www.sciencedirect.com/science/article/pii/S0378375806001339)  
201 [S0378375806001339](http://www.sciencedirect.com/science/article/pii/S0378375806001339). Special Issue on Nonparametric Statistics and Related Topics: In honor  
202 of M.L. Puri.
- 203 [6] Lukas Steinberger and Hannes Leeb. Conditional predictive inference for high-dimensional  
204 stable algorithms, 2018. arXiv preprint.



### Coverage on MEPS

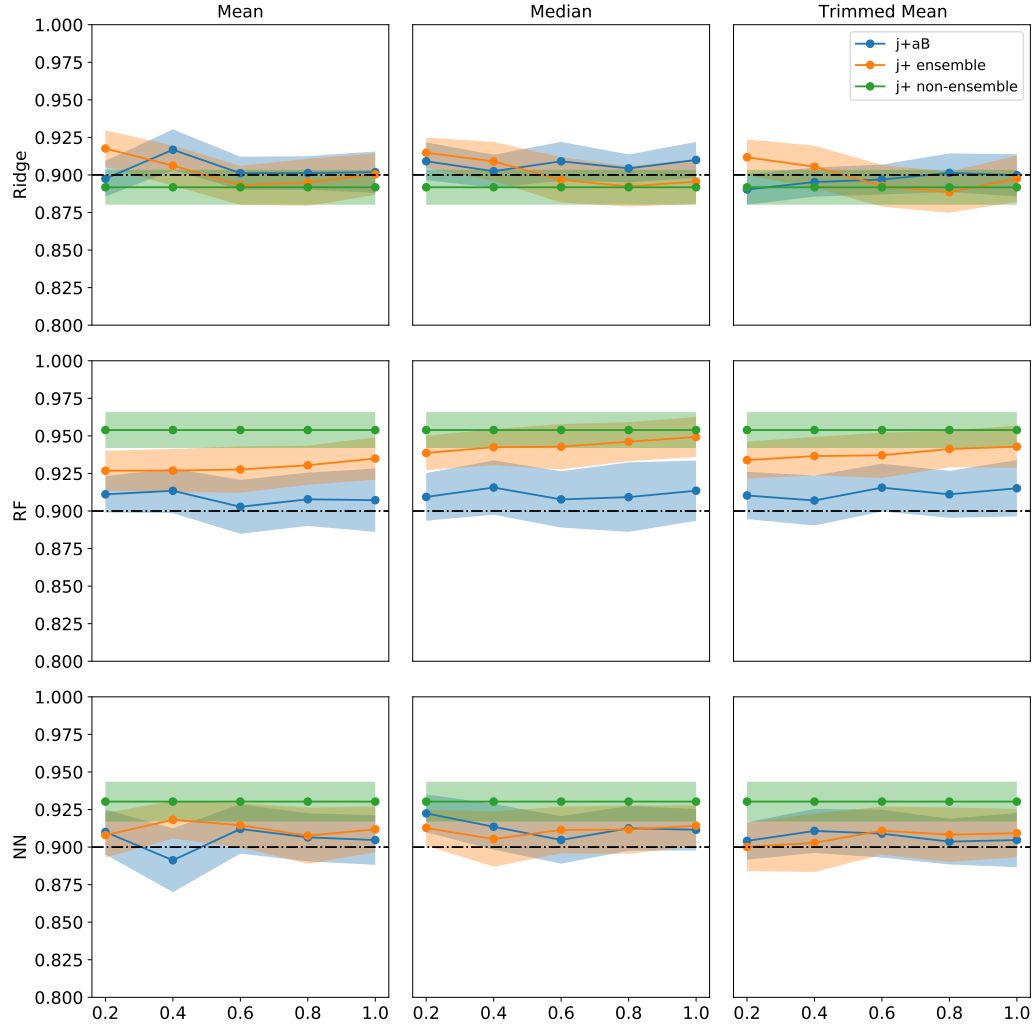

Figure S1: Comparing the coverage of J+AB, J+ ENSEMBLE, and J+ NON-ENSEMBLE for varying  $m/n$  on MEPS data set. The solid lines show the average, and the shaded areas show  $\pm$  one standard error over 10 independent splits of the data. The black dash-dotted line marks the  $1 - \alpha$  target coverage level.

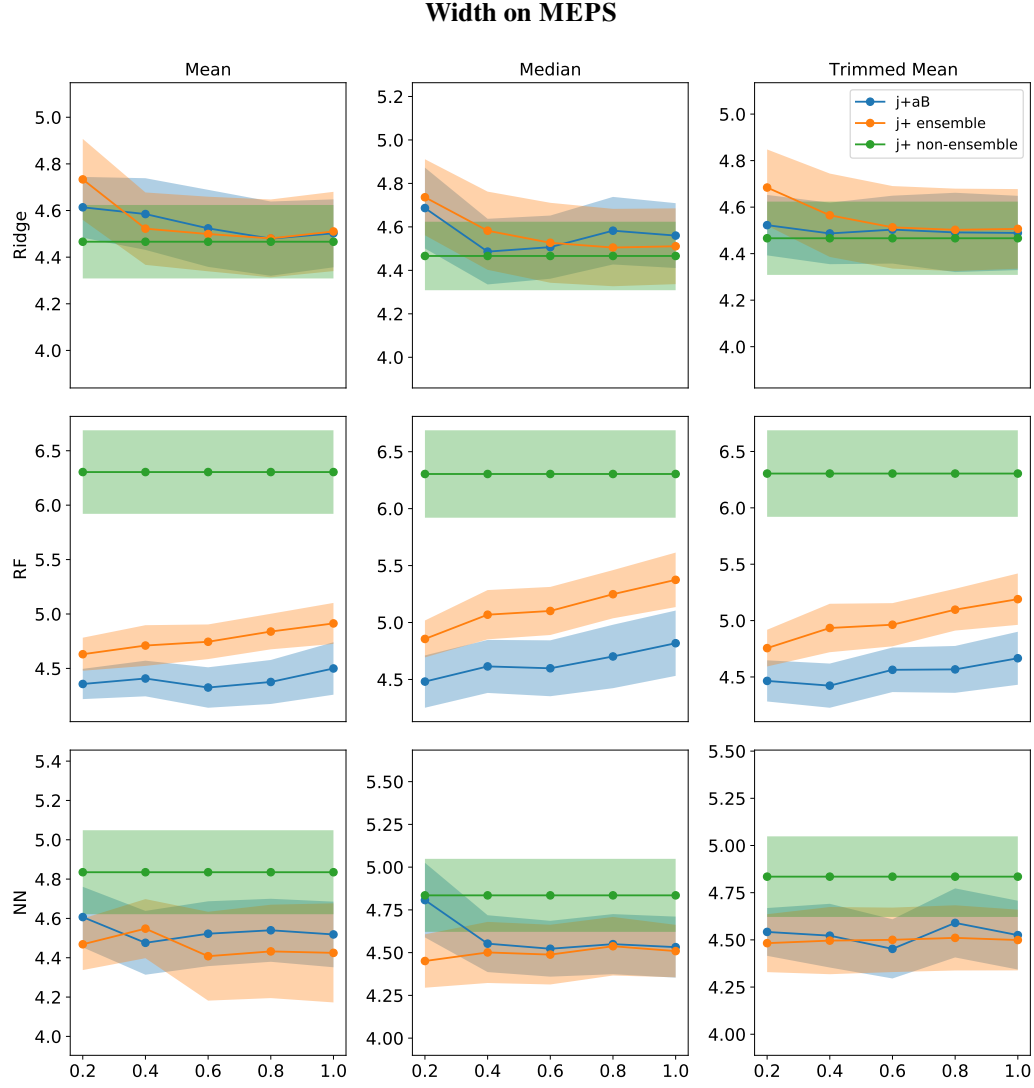

Figure S2: Comparing the interval width of J+AB, J+ ENSEMBLE, and J+ NON-ENSEMBLE for varying  $m/n$  on MEPS data set. The solid lines show the average and the shaded areas show  $\pm$  one standard error over 10 independent splits of the data.

### Coverage on COMMUNITIES

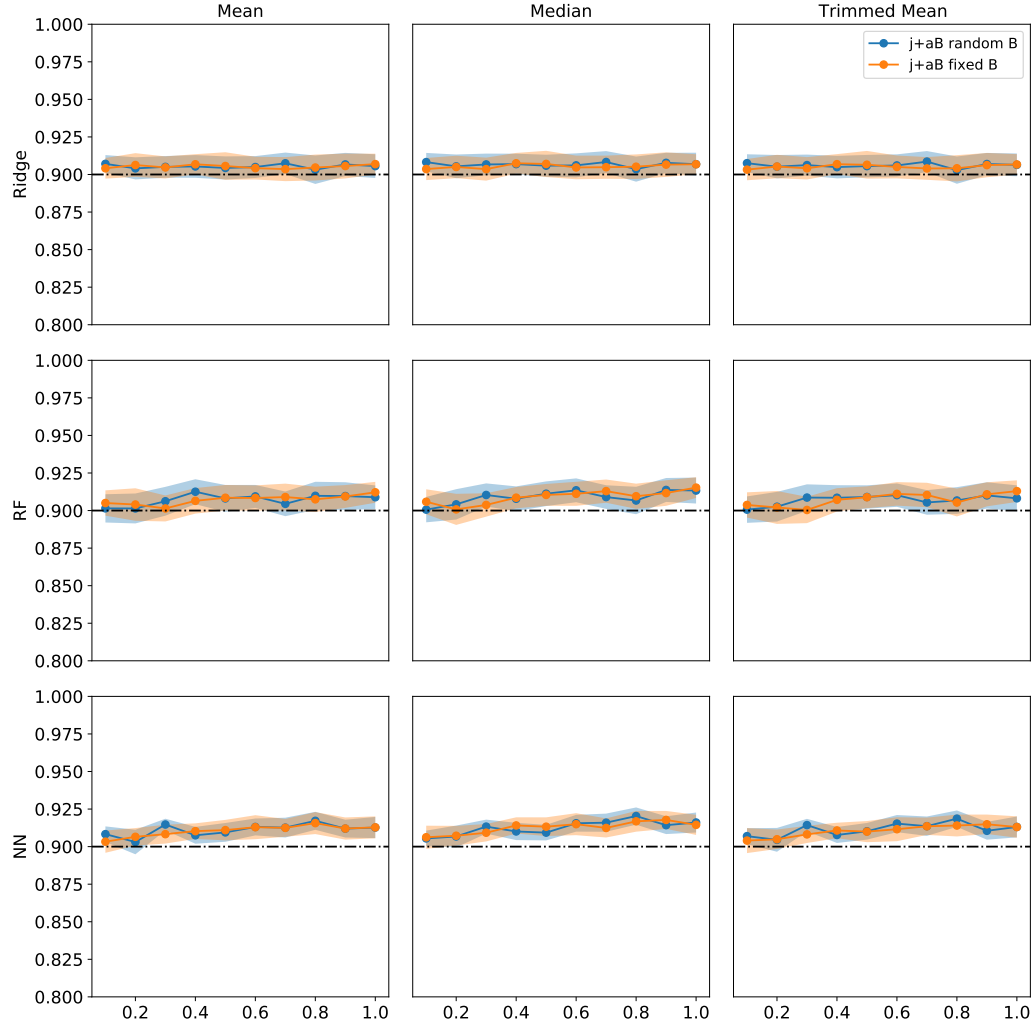

Figure S3: Average coverage of J+AB RANDOM and J+AB FIXED on COMMUNITIES data set. The solid lines show the average and the shaded areas show  $\pm$  one standard error over 10 independent splits of the data. The black dash-dotted line marks the  $1 - \alpha$  target coverage level.

### Coverage on BLOG

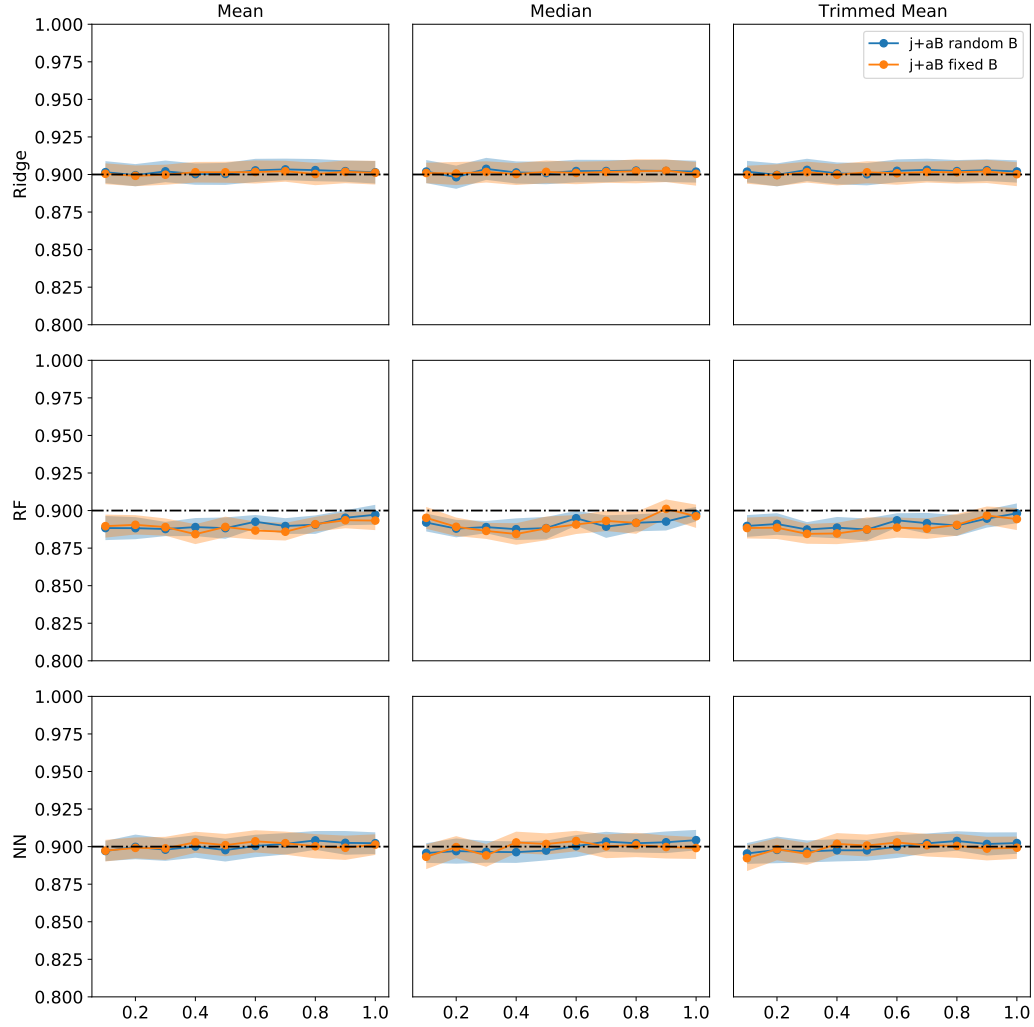

Figure S4: Average coverage of J+AB RANDOM and J+AB FIXED on BLOG data set. The solid lines show the average, and the shaded areas show  $\pm$  one standard error over 10 independent splits of the data. The black dash-dotted line marks the  $1 - \alpha$  target coverage level.

### Coverage on MEPS

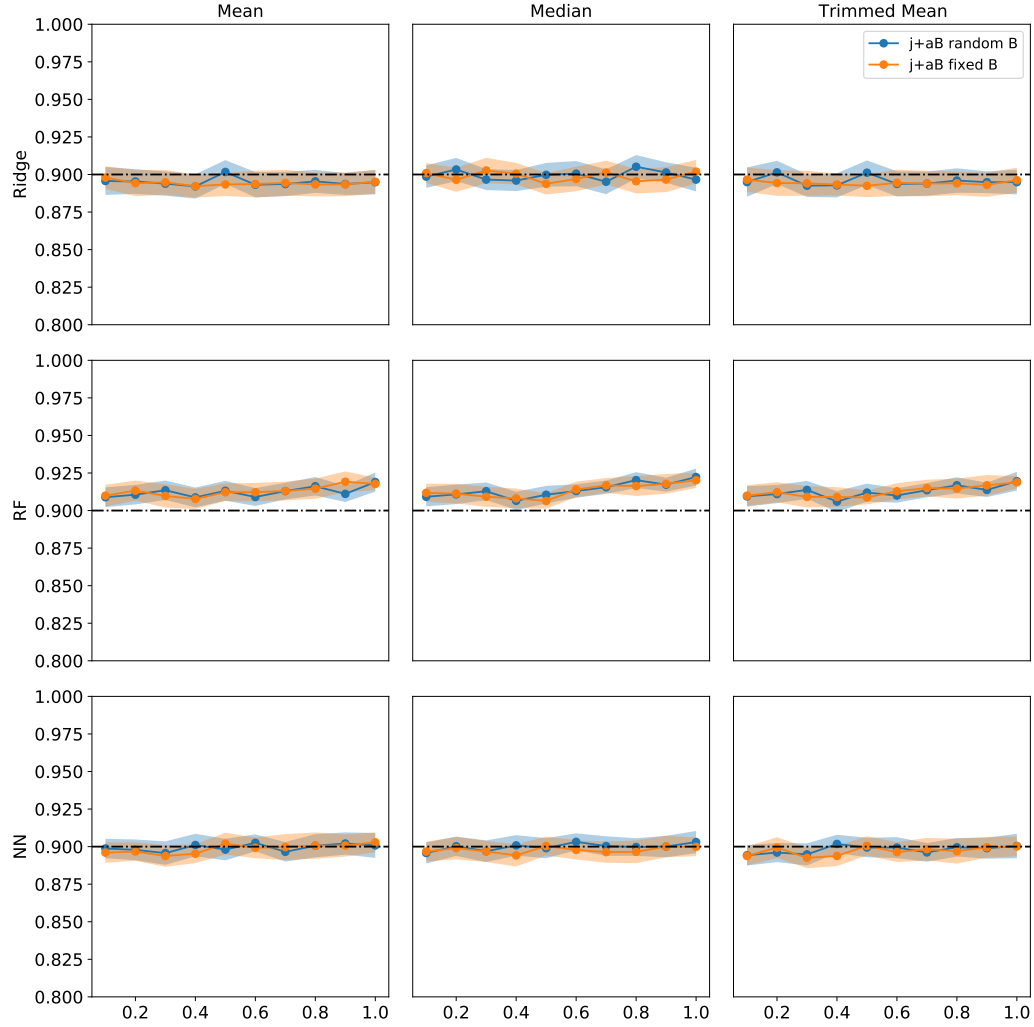

Figure S5: Average coverage of J+AB RANDOM and J+AB FIXED on MEPS data set. The solid lines show the average, and the shaded areas show  $\pm$  one standard error over 10 independent splits of the data. The black dash-dotted line marks the  $1 - \alpha$  target coverage level.

### Width on COMMUNITIES

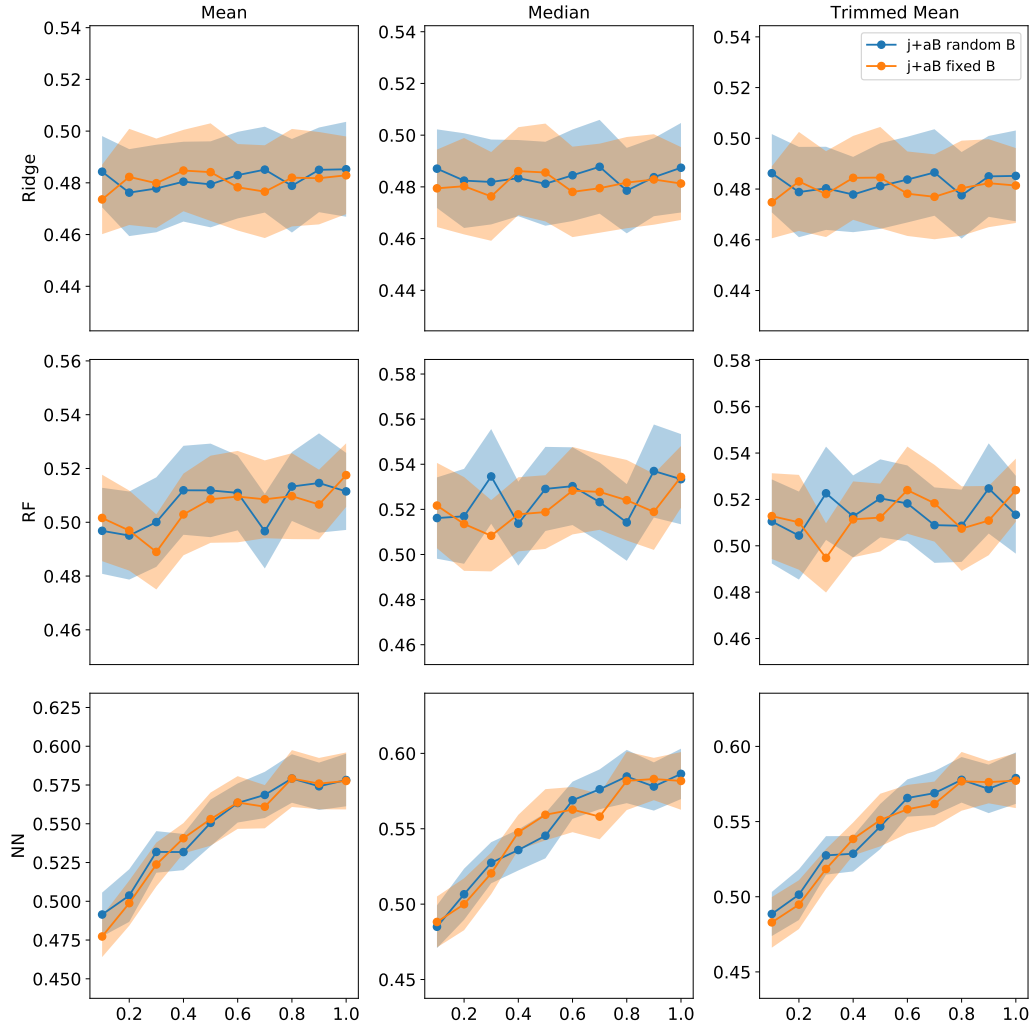

Figure S6: Average interval width of J+AB RANDOM and J+AB FIXED on COMMUNITIES data set. The solid lines show the average, and the shaded areas show  $\pm$  one standard error over 10 independent splits of the data.

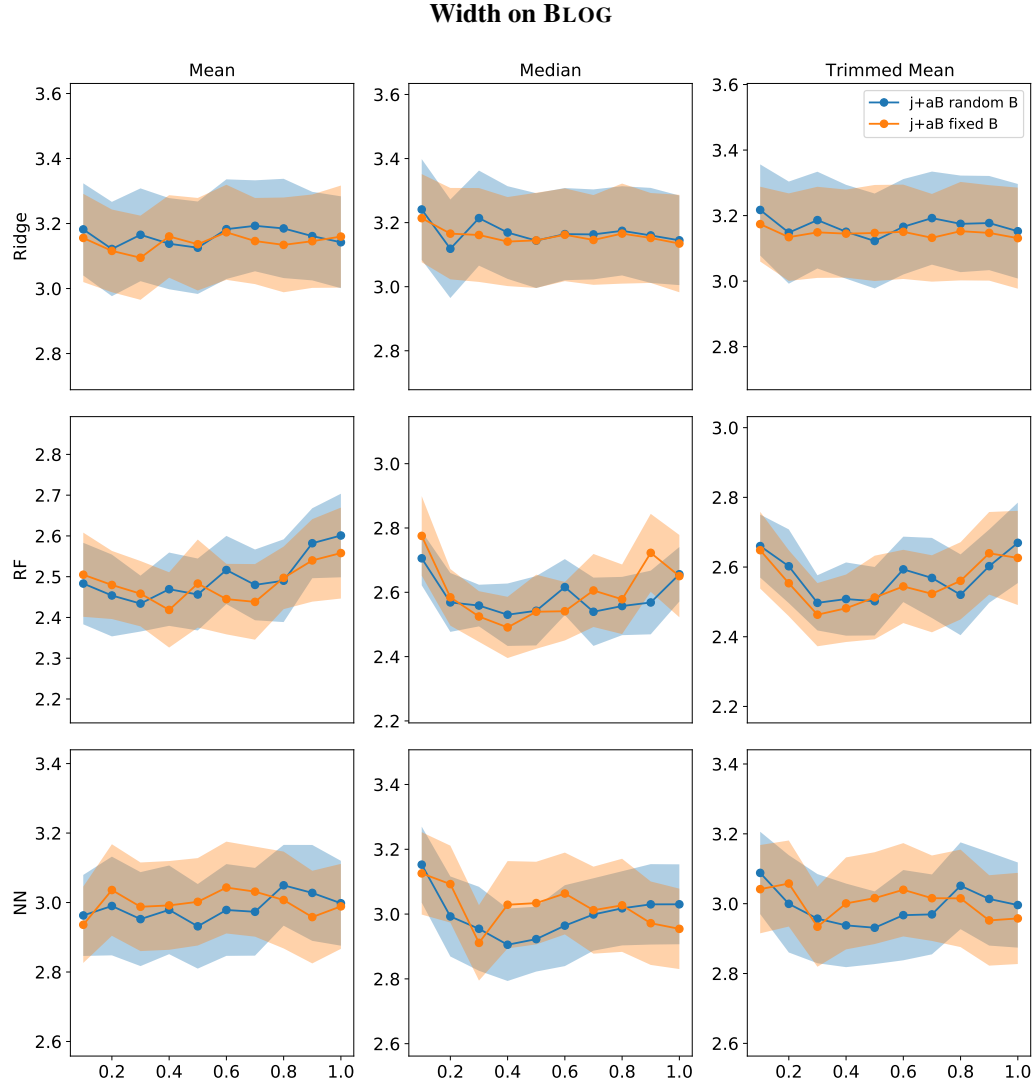

Figure S7: Average interval width of J+AB RANDOM and J+AB FIXED on BLOG data set. The solid lines show the average, and the shaded areas show  $\pm$  one standard error over 10 independent splits of the data.

### Width on MEPS

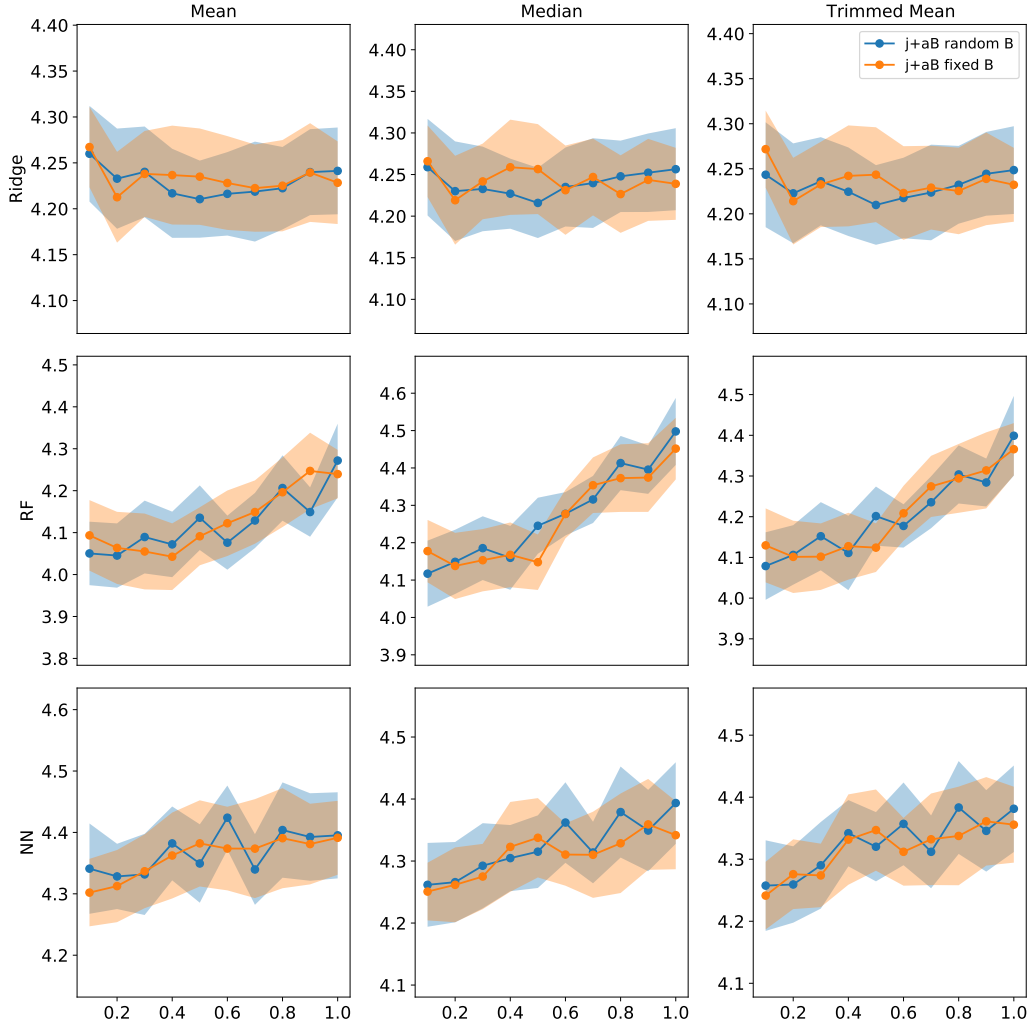

Figure S8: Average interval width of J+AB RANDOM and J+AB FIXED on MEPS data set. The solid lines show the average, and the shaded areas show  $\pm$  one standard error over 10 independent splits of the data.
